# Supplementary material for: Factors affecting the medication literacy of older adults and targeted initiatives for improvement: a cross-sectional study in central China
Source: Front Public Health. 2024 Jan 16;11:1249022. doi: 10.3389/fpubh.2023.1249022 (PMC10826508; doi:10.3389/fpubh.2023.1249022)
Supplement: Supplementary file 2 [file Table_2.xlsx]

## Sheet: Sheet1
Supplementary table 2. The detailed information and reason of questionnaire setting.
Question	True/False	Reason
01. Whatever the disease, you should try to get injections and fluids as much as possible	False	According to the statistics of the World Health Organization, more than 70% of infusions are unnecessary. Overuse and abuse of injections can increase unnecessary risks and adverse effects, such as fever, pulmonary edema, etc., which can be life-threatening in severe cases. Whether to get injection and infusion or not should follow the doctor's instructions to ensure the therapeutic safety and ef…
02. Injections are safer than oral drugs	False	Injection administration is usually given to patients with dysphagia and malabsorption, or the condition that oral administration can not achieve an effective drug concentration. Compared with injection, oral administration is more convenient, safe and economical. Injection may be accompanied by a series of adverse reactions, such as infection, pain and phlebitis at the injection site. In additio…
03. The more expensive the medicine, the safer it is	False	The safety and effectiveness of drug mainly depend on the composition, dosage, side effects, adaptation disease, etc., and have no direct relationship with the price. The reason some drugs are more expensive may be due to their scarce ingredients, complex extraction processes, or high production costs, which are not directly related to the drug safety and effectiveness. On the contrary, the reaso…
04. The more expensive the medicine, the more effective it is	False
05. When purchasing drugs, one should judge the quality of drugs based on brand and reputation	False	The purchase of drugs should not only focus on the brand and reputation, but also need to cosiderate a variety of factors to make a comprehensive judgment, including the purchase channel, the appearance and smell of the drug, the packaging and labeling, price, the expiration date and so on.
06. The more varieties of medication used, the better the effect	False	Brand and reputation can indeed be used as reference factors in judging the drug quality, but not the decisive factors. There are a wide variety of drugs of varying quality in China. It is difficult for the average consumer to judge the quality and safety of drugs. Therefore, brand and reputation become one of the important bases for consumers to choose drugs. However, they are not definitive cri…
07. The longer the course of medication, the better the therapeutic effect	False	The length of the treatment course is synthetically determined by the severity of the condition, the type and property of the drug, the patient's physical condition and other factors. Longer medication course does not mean better therapeutic effect. Overlong of medication course may lead to increased risk of adverse drug reactions and resistance, more psychological and economic burden of patients…
08. If you feel any discomfort, you should take medication immediately	False	When feeling discomfort, the etiology should first be determined and then the doctor's advice should be sought to receive appropriate medication or treatment.
09. Health products are drugs	False	Health products are a type of food. They have the commonality of general food, that is, can regulate the function of human body, and is suitable for consumption by specific population, but it is not for the purpose of treating diseases. Drugs refer to substances used for the prevention, treatment and diagnosis of human diseases and for the purposeful regulation of human physiological functions, w…
10. Taking health products can reduce the amount of medicine you use	False	Health products and medicines have completely different functions and uses. Health products can improve physical conditions to a certain extent. However, they cannot be used to treat diseases or replace medicines. Taking health products as medicine may lead to the delay of illness or other adverse consequences.
11. All the oral medication can be taken with milk, coffee, or beverages	False	Milk, coffee, juice or other beverages may affect the therapeutic effect or aggravate the adverse reactions of certain medicines. For example, fruit acids in juice can accelerate the dissolution of some drugs such as ibuprofen and aspirin, thereby damaging the stomach lining. Calcium in milk binds to tetracycline antibiotics to form insoluble substances that are difficult to absorb, resulting in …
12.Any medication can be taken simultaneously	False	The drug interactions may occur between certain drug combination, and simultaneously taking of which may affect the therapeutic efficacy, increase the risk of adverse reactions, and even endanger the patients’ life safety. For example, combining aspirin and ibuprofen may increase the risk of bleeding. Cephalosporins (especially first-generation cephalosporins) combined with high-potency diuretics…
13. Treating cold and fever with antibiotics	False	Colds and fevers can be caused by a variety of pathogenic factors, including bacterial and viral infections. Antibiotics are mainly used to treat bacteria-related infectious diseases. it's worth noting that different antibiotics target special types of bacteria. It is necessary to choose the appropriate antibiotic under the guidance of the doctor or pharmacist. If the fever is caused by the viral…
14. Antibiotics are anti-inflammatory drugs	False	It is a common misconception to equate antibiotics with anti-inflammatory drugs. Anti-inflammatory drugs refer to drugs with anti-inflammatory and anti-rheumatic effects, such as steroid and non-steroid anti-inflammatory drugs. Antibiotics can alleviate inflammation caused by special types of bacterial infection to some extent, but they cannot directly fight the inflammation. This misconception h…
15. Antibacterial drugs can kill viruses and all the bacteria	False	The antibiotics abuse phenomenon is widespread in China. Once getting a fever, cold, headache, etc., many people just take amoxicillin, cephalosporin or other antibiotics without figure out the pathogeny. The question was meant to inform people that antibiotics are ineffective against viruses and should only be used for bacterial infections within their antibacterial spectrum.
16. When people around you experience colds, fever, or other illnesses, you can take antibiotics for prevention	False	Antibiotics cannot prevent colds and fevers. Abuse of antibiotics may lead to antibiotic resistance or other adverse consequences. Ways to prevent colds and fevers include improving psychological fitness, paying attention to the individual safety protection, avoiding close contact with patients, and getting vaccinated, etc.
17. There will be no adverse reactions when taking over-the-counter drugs	False	Although over-the-counter drugs can be purchased without the doctor's prescription, they can still cause adverse reactions. When taking non-prescription drugs, it is still necessary to read the drug instructions carefully and following with the prescribed usage and dosage. If any discomfort is felt, stop taking the medication and seek medical attention immediately.
18. Adverse drug reactions belong to medical accidents	False	Adverse drug reactions do not belong to medical accidents. Adverse drug reaction refers to various discomfort or abnormal reactions caused by the drug itself or drug interactions during the treatment, including the side effects, toxic effects and allergic reactions, etc. These reactions are caused by the properties of the drug, instead of the medical errors or mistakes.
19. Adverse drug reactions can be mitigated by symptomatic treatment with other drugs	False	When an adverse drug reaction occurs, you should first stop the drug immediately and then consulted the doctor or pharmacist for professional advice as soon as possible.
20. The efficacy and safety of new drugs are definitely better than those of old drugs	False	There are no unconditional advantages or disadvantages between new and old drugs. New drugs are usually designed on the basis of old drugs, and may have better efficacy and specificity. However, the clinical application time of new drugs is short and the clinical practice data are limited. There may be some unidentified adverse reactions and the safety needs to be further verified. On the contrar…
21. In any case, do not use "addictive" drugs such as sleeping pills and painkillers	False	In some cases, the use of sleeping pills and pain medications may be necessary, and the benefits of treating certain severe pain and sleep problems outweigh the risk of addiction. Therefore, when necessary, it can be used correctly according to the doctor's advice to avoid or reduce addiction.
22. All drugs can be stored at room temperature	False	Some drugs should be stored at room temperature, but some drugs, such as vaccines, blood preparations, antibiotics, etc. need to be refrigerated. The storage method has to strictly follow the drug instructions to ensure drug quality and patient safety.
23. There is no need to consider the effect of "light" when storing any medicine	False	The drug storage conditions are clearly stated in the drug instructions. The ultraviolet light in sunlight is the catalyst for many chemical reactions, which will accelerate the oxidation, reduction, hydrolysis, polymerization or isomerization reactions of certain drugs. These may lead to decreased active ingredient content and lower therapeutic efficacy, or an increase in impurities and even tox…
24. Children (infants) can take adult medication as long as the dosage is reduced appropriately	False	Children (infants) should take children (infants)'s dosage forms of medicine. The liver, kidney and other organs of children are not fully developed, and the enzyme system is not completely established. The physiology, pathology and other aspects are different between children and adults. Letting the children to take adult drugs my lead to unpredictable consequences.
25. Elderly patients should reduce the medication intake due to a decreased physiological function compared to young adults	False	Elderly patient usually suffers from a declined physical function, which may affect the drug absorption, metabolism and excretion. Therefore, older people may need to reduce the dosage of certain medications. However, the reduction dosage and method may vary from different drugs and individuals. In addition, older patients often need to take multiple medications at the same time. In this case, mo…
26. Whether male or female, any medication can be used during pregnancy preparation	False	Both men and women should try to avoid taking medicine during pregnancy preparation, so as to avoid the drugs accumulation in the body and affect the growth and development of the fetus.
27.Do you know the difference between prescription drugs and over-the-counter drugs?	/	/
28.Do you know how to distinguishmedicines and health care products accroding to the drug approval number?	/	/
29. Do you know that when taking certain drugs, the dosage should be adjusted appropriately according to the patient's liver and kidney function and other conditions?	/	/
30. Do you know when treating and preventing certain diseases, the dosage of the same drug may be different?	/	/
31.Do you know that the combination of some drugs may lead to poisoning, liver and kidney damage, or other serious consequences?	/	/
32.Do you know the method for determining whether the drug has deteriorated?	/	/
33. Vaccination is the most effective and economical measure to prevent certain diseases	True	Vaccination is a very important preventive measure against disease. Vaccination can greatly reduce the risk of contracting certain diseases. The vaccine has undergone a rigorous testing and approval process, and its safety and effectiveness are assured. It can not only prevent individual diseases, but can also effectively reduce the spread of diseases through widespread vaccination.
34. Pharmacists can provide good advice on whether I need to take medication	True	The medication literacy of the elderly is not only limit to their knowledge of rational drug usage, but also their awareness of drug-use safety. It is difficult for the elderly to master all the medication-related professional knowledge, so whether they are willing to seek professional help from pharmacists when they encounter medication problems will have a huge impact on treatment effectiveness…
35. Pharmacists can provide me with good advice on how to take medication nationally	True
36. Women during pregnancy or lactation should check the "Contraindications/Special Population Precautions" or consult a doctor or pharmacist before taking any medication	True	Medications that are safe for the average adult may not be appropriate for pregnant or breastfeeding women. Some drugs may enter the fetus through placenta, further affecting fetal development and even leading to abnormalities, miscarriage or death. Drugs may also be secreted through breast milk, further affecting the baby’s health. Therefore, before taking any medication, pregnant or breastfeedi…
37. Purchase drugs based on your own experience or advertising	False	Buying medicines based on personal experience or advertising carries certain risks. Medicine is a special type of commodity, and its quality is directly related to the health and life safety of consumers. The selection of drugs should follow the principles of science, rationality and safety, and listen to the professional advice of the doctor or pharmacist.
38. When seeking medical treatment, ask the doctor for a specific medication	False	Doctors will comprehensively consider the patient's physical condition, medical history, allergy history, drug indications, drug interactions and other factors to prescribe to ensure that patients can get the most appropriate drug treatment. Patients could give a detailed description of their symptoms, possible allergies and other requirements to the doctor, so that the doctor can make better dia…
39. Listen to the shop assistants' advice when purchasing drugs at a pharmacy	False	Not all the pharmacy clerks in China are licensed pharmacists. It is better to consult a qualified doctor or pharmacist before purchasing to ensure the rationaly use of the drug.
40. Unauthorized taking traditional Chinese medicine while taking Western medicine	False	Traditional Chinese medicine (TCM) is a kind of traditional Chinese medicine, and its composition is usually complicated. The TCM should not be taken with western medicine at the same time to avoid possible drug interaction, affecting efficacy or increasing adverse reactions.
41. Pinches the childs' nose to administer medication constrainedly if they refuses to take medication	False	Children should not be forced to take medicine, and appropriate measures should be taken to guide them to accept the medicine. Examples include giving rewards, distracting, and using animations, pictures, or short stories to help children understand the reasons and effects of taking the drug.
42. Taking drugs that have exceeded the expiration date	False	Taking a drug beyond its expiration date may cause serious harm to one’s health, as the drug may have lost its efficacy or produced harmful substances. Once the drug is found to have exceeded its expiry date, it should be stopped immediately.
43. Neglecting the time interval of taking medication	False	The medication must be taken in strict accordance with the doctor's advice or instructions. Ignoring the time interval between doses may affect drug efficacy or increase adverse reactions. It is necessary for patients to pay attention to the time interval and dosage of the medication.
44. Break or grind the drug before taking it regardless the dosage form.	False	In general, it is not recommended to break or grind all medications before taking them. For example, taking crushed alendronate sodium may cause damage to digestive tract mucosa, taking crushed cefuroxime axetil may lead to esophageal ulcers. Therefore, there is no need to break or grind the drug if it is not explicitly stated in the drug instruction or doctor's advice.
45. Taking several medications at the same time without consulting a doctor or pharmacist	False	Taking several medications at the same time without consulting a doctor or pharmacist may lead to undesired drug interactions and adverse reactions. When taking multiple drugs, patients should strictly follow the doctor's guidance to avoid incompatibility and antagonism between drugs.
46. After taking prescription drugs for a few days, change the medication without authorization if you feel that they are ineffective,	False	This behavior is incorrect. If you think feel the drugs are ineffective, you should communicate with your doctor to seek a more appropriate treatment. Unauthorized change of medications may affect the treatment effect, and even lead to disease aggravation.
47. In order to make the drug "quickly take effect", double the dosage of the drug for the first time without authorization	False	Not all medicines can be doubled in the first dose. Only a few drugs can be doubled at the first dose to rapidly reach steady-state concentration. Unauthorized doubling of the first dose of a drug may lead to overdose, poisoning or other serious consequences.
48. In order to consolidate the effect of drug treatment, extend the time of medication after the condition has recovered or has reached the course of medication	False	After the condition has recovered or the course of medication has been reached, the medication should be stopped or the dose should be adjusted according to the doctor's advice. Authorially extending the duration of medication may lead to increased risk of adverse drug reactions, the development of drug resistance and other adverse outcome.
49. When adverse drug reactions occur, you stop taking it instead of consulting the doctor, pharmacist, or seeking help from the hospital or pharmacy.	False	When an adverse drug reaction occurs, you should stop the drug immediately and consulted the doctor or pharmacist for professional advice as soon as possible.
50. Purchasing the prescription drugs at pharmacy with the doctor's prescription	True	Prescription drugs cannot be sold in pharmacies to patients without prescriptions. Patients can purchase prescription drugs at pharmacies with the certificate from the doctors.
51. Carefully read the drug instructions before taking the drugs	True	Reading the drug instructions before medication can ensure the correctly drug usage and avoid health problems caused by misunderstanding or inappropriate use. Patients can obtain important information from the drug instruction (including drug name, ingredients, indications, usage and dosage, adverse reactions, contraindications, precautions, storage methods, expiry date, etc.), thereby avoiding d…
52. Before medication, carefully read the side effects of the drug	True
53. Read the instructions to understand the contraindications when using a drug (drinking, driving, body position, etc.)	True
54. For drugs with special usage devices, carefully read the device instructions before use it	True
55. Consult pharmacists when you do not know how to use/take the drugs (by telephone consultation, going to a medication consultation center, consulting a pharmacist at the hospital, or conducting online pharmacy consultations)	True	The medication literacy of the elderly is not only limit to their knowledge of rational drug usage, but also their awareness of drug-use safety. It is difficult for the elderly to master all the medication-related professional knowledge, so whether they are willing to seek professional help from pharmacists when they encounter medication problems will have a huge impact on treatment effectiveness…
